# Supplementary material for: Multiple Analyses of G-Protein Coupled Receptor (GPCR) Expression in the Development of Gefitinib-Resistance in Transforming Non-Small-Cell Lung Cancer
Source: PubMed Central journal article supplement (PMC3483178; doi:10.1371/journal.pone.0044368), 2012-10-29
Supplement: pone.0044368.s001.pdf [file pone.0044368.s001.pdf]

**Figure S1 List of 384 GPCR gene symbols in microarray**

| Symbol  | Description                                                   | Symbol  | Description                                                                      |
|---------|---------------------------------------------------------------|---------|----------------------------------------------------------------------------------|
| GABBR1  | gamma-aminobutyric acid (GABA) B receptor, 1                  | GPR113  | G protein-coupled receptor 113                                                   |
| MRGPRX4 | MAS-related GPR, member X4                                    | PTGER1  | prostaglandin E receptor 1                                                       |
| PTH1R   | parathyroid hormone receptor 1                                | MRGPRX3 | MAS-related GPR, member X3                                                       |
| FZD10   | frizzled homolog 10 (Drosophila)                              | OR2C3   | olfactory receptor, family 2, subfamily C, member 3                              |
| BDKRB2  | bradykinin receptor B2                                        | GPR6    | G protein-coupled receptor 6                                                     |
| P2RY10  | purinergic receptor P2Y, G-protein coupled, 10                | RLN3R1  | relaxin family peptide receptor 3                                                |
| GPR12   | G-protein coupled receptor 12                                 | TAAR8   | trace amine associated receptor 8                                                |
| TAAR2   | trace amine-associated receptor 2                             | GPR150  | G protein-coupled receptor 150                                                   |
| CHRM1   | cholinergic receptor, muscarinic 1                            | TAAR1   | trace amine-associated receptor 1                                                |
| C11ORF4 | mitochondrial ribosomal protein L49                           | GRM2    | glutamate receptor, metabotropic 2                                               |
| OPN3    | opsin 3                                                       | FPRL2   | formyl peptide receptor 3                                                        |
| GCGR    | glucagon receptor                                             | GPR83   | G protein-coupled receptor 83                                                    |
| GRPR    | gastrin-releasing peptide receptor                            | GPR25   | G protein-coupled receptor 25                                                    |
| RARS    | arginyl-tRNA synthetase                                       | GPR62   | G protein-coupled receptor 62                                                    |
| ADRA2B  | adrenergic, alpha-2B-, receptor                               | HRH2    | histamine receptor H2                                                            |
| CMKLR1  | chemokine-like receptor 1                                     | GPR4    | G protein-coupled receptor 4                                                     |
| XCR1    | chemokine (C motif) receptor 1                                | GPR40   | free fatty acid receptor 1                                                       |
| EMR1    | egf-like module containing mucin-like hormone receptor-like 1 | MELL1   | mel transforming oncogene-like 1                                                 |
| MC2R    | melanocortin 2 receptor (adrenocorticotrophic hormone)        | CHRM5   | cholinergic receptor, muscarinic 5                                               |
| MC3R    | melanocortin 3 receptor                                       | OXER1   | oxoecosanoid (OXE) receptor 1                                                    |
| GPR133  | G protein-coupled receptor 133                                | GNRHR   | gonadotropin-releasing hormone receptor                                          |
| DRD1    | dopamine receptor D1                                          | GPR120  | G protein-coupled receptor 120                                                   |
| CYSLTR2 | cysteinyl leukotriene receptor 2                              | GPR111  | G protein-coupled receptor 111                                                   |
| GPR142  | G protein-coupled receptor 142                                | EDG6    | endothelial differentiation, lysophosphatidic acid G-protein-coupled receptor, 6 |
| GHSR    | growth hormone secretagogue receptor                          | VN1R5   | vomer nasal 1 receptor 5                                                         |
| HTR1B   | 5-hydroxytryptamine (serotonin) receptor 1B                   | HTR1A   | 5-hydroxytryptamine (serotonin) receptor 1A                                      |
| BLR1    | chemokine (C-X-C motif) receptor 5                            | MC4R    | melanocortin 4 receptor                                                          |
| GPR     | P2 phage tail completion protein R                            | TAAR5   | trace amine-associated receptor 5                                                |
| BAI2    | brain-specific angiogenesis inhibitor 2                       | GPR32   | G protein-coupled receptor 32                                                    |
| GPR1    | G protein-coupled receptor 1                                  | PTGER4  | prostaglandin E receptor 4 (subtype EP4)                                         |
| GPR65   | G-protein coupled receptor 65                                 | GPR135  | G protein-coupled receptor 135                                                   |
| GPR45   | G protein-coupled receptor 45                                 | ADORA3  | adenosine A3 receptor                                                            |
| P2RY13  | purinergic receptor P2Y, G-protein coupled, 13                | ADORA1  | adenosine A1 receptor                                                            |
| FZD2    | frizzled homolog 2 (Drosophila)                               | SSTR3   | somatostatin receptor 3                                                          |
| GPR141  | G protein-coupled receptor 141                                | HTR7    | 5-hydroxytryptamine (serotonin) receptor 7                                       |
| GPR174  | G protein-coupled receptor 174                                | OR7C2   | olfactory receptor, family 7, subfamily C, member 2                              |
| GPR23   | G protein-coupled receptor 23                                 | TAAR6   | trace amine associated receptor 6                                                |
| GPR24   | melanin-concentrating hormone receptor 1                      | CCRL2   | chemokine (C-C motif) receptor-like 2                                            |
| ACTB    | actin, beta                                                   | FY      | fuzzy                                                                            |
| CYSLTR1 | cysteinyl leukotriene receptor 1                              | FKSG83  | FKSG83                                                                           |
| GPR63   | G protein-coupled receptor 63                                 | TAAR9   | trace amine associated receptor 9                                                |
| TACR2   | tachykinin receptor 2                                         | MRGPRX1 | MAS-related GPR, member X1                                                       |
| CCR3    | chemokine (C-C motif) receptor 3                              | PPIA    | peptidylprolyl isomerase A                                                       |
| GPR147  | neuropeptide FF receptor 1                                    | AGTRL1  | angiotensin II receptor-like 1                                                   |
| TBXA2R  | thromboxane A2 receptor                                       | FZD9    | frizzled homolog 9 (Drosophila)                                                  |
| GPR21   | G protein-coupled receptor 21                                 | GPR31   | G protein-coupled receptor 31                                                    |
| GPR126  | G protein-coupled receptor 126                                | P2RY8   | purinergic receptor P2Y, G-protein coupled, 8                                    |
| SSTR5   | somatostatin receptor 5                                       | OPRL1   | opiate receptor-like 1                                                           |
| HTR1F   | 5-hydroxytryptamine (serotonin) receptor 1F                   | POLR2A  | polymerase (RNA) II (DNA directed) polypeptide A                                 |
| BAI1    | brain-specific angiogenesis inhibitor 1                       | CD97    | CD97 molecule                                                                    |
| CCBP2   | chemokine binding protein 2                                   | VN1R2   | vomer nasal 1 receptor 2                                                         |
| LONPL   | lon peptidase 2, peroxisomal                                  | CHRM3   | cholinergic receptor, muscarinic 3, cardiac                                      |
| GPR68   | G protein-coupled receptor 68                                 | MAS1L   | MAS1 oncogene-like                                                               |
| GPR148  | G protein-coupled receptor 148                                | GIPR    | gastric inhibitory polypeptide receptor                                          |
| LANCL1  | LanC lantibiotic synthetase component C-like 1 (bacterial)    | GPR30   | G protein-coupled estrogen receptor 1                                            |
| NPY1R   | neuropeptide Y receptor Y1                                    | PPYR1   | pancreatic polypeptide receptor 1                                                |
| C3AR1   | complement component 3a receptor 1                            | CALCR   | calcitonin receptor                                                              |
| OXGR1   | oxoglutarate (alpha-ketoglutarate) receptor 1                 | SLC26A7 | solute carrier family 26, member 7                                               |
| HTR1E   | 5-hydroxytryptamine (serotonin) receptor 1E                   | GPR152  | G protein-coupled receptor 152                                                   |
| GPR51   | gamma-aminobutyric acid (GABA) B receptor, 2                  | CCR4    | chemokine (C-C motif) receptor 4                                                 |
| GPR8    | neuropeptides B/W receptor 2                                  | GPR34   | G protein-coupled receptor 34                                                    |
| GPR173  | G protein-coupled receptor 173                                | GPR77   | G protein-coupled receptor 77                                                    |
| GPR101  | G protein-coupled receptor 101                                | SSTR2   | somatostatin receptor 2                                                          |
| HCRTR2  | hypocretin (orexin) receptor 2                                | DRD5    | dopamine receptor D5                                                             |

| Symbol  | Description                                                                        | Symbol  | Description                                                     |
|---------|------------------------------------------------------------------------------------|---------|-----------------------------------------------------------------|
| MATK    | megakaryocyte-associated tyrosine kinase                                           | MLNR    | motilin receptor                                                |
| EDG8    | sphingosine-1-phosphate receptor 5                                                 | MRGPRD  | MAS-related GPR, member D                                       |
| GPR146  | G protein-coupled receptor 146                                                     | MTNR1B  | melatonin receptor 1B                                           |
| LPHN1   | latrophilin 1                                                                      | NMBR    | neuromedin B receptor                                           |
| MAS1    | MAS1 oncogene                                                                      | LGR5    | eucine rich repeat containing G protein coupled receptor 5      |
| ADRA1B  | adrenergic, alpha-1B-, receptor                                                    | LHCGR   | uteinizing hormone/choriogonadotropin receptor                  |
| GPR85   | G protein-coupled receptor 85                                                      | LPHN3   | atrophilin 3                                                    |
| GPRC5B  | G protein-coupled receptor, family C, group 5, member B                            | MC5R    | melanocortin 5 receptor                                         |
| GPR54   | G protein-coupled receptor 54                                                      | HTR5A   | 5-hydroxytryptamine (serotonin) receptor 5A                     |
| OXTR    | oxytocin receptor                                                                  | HTR6    | 5-hydroxytryptamine (serotonin) receptor 6                      |
| OR2A4   | OR2A4 olfactory receptor, family 2, subfamily A, member 4                          | IL8RA   | interleukin 8 receptor, alpha                                   |
| LPHN2   | latrophilin 2                                                                      | IL8RB   | interleukin 8 receptor, beta                                    |
| PTGER2  | prostaglandin E receptor 2 (subtype EP2), 53kDa                                    | HRH4    | histamine receptor H4                                           |
| P2RY5   | lysophosphatidic acid receptor 6                                                   | HTR2A   | 5-hydroxytryptamine (serotonin) receptor 2A                     |
| LGR7    | relaxin/insulin-like family peptide receptor 1                                     | HTR2C   | 5-hydroxytryptamine (serotonin) receptor 2C                     |
| PTGFR   | prostaglandin F receptor (FP)                                                      | HTR4    | 5-hydroxytryptamine (serotonin) receptor 4                      |
| FZD6    | frizzled homolog 6 (Drosophila)                                                    | GRM7    | glutamate receptor, metabotropic 7                              |
| GRM4    | glutamate receptor, metabotropic 4                                                 | GRM8    | glutamate receptor, metabotropic 8                              |
| CALCRL  | calcitonin receptor-like                                                           | HCRTR1  | hypocretin (orexin) receptor 1                                  |
| EBI2    | Epstein-Barr virus induced gene 2 (lymphocyte-specific G protein-coupled receptor) | HRH3    | histamine receptor H3                                           |
| CELSR2  | adherin, EGF LAG seven-pass G-type receptor 2 (flamingo homolog, Drosophila)       | GRM1    | glutamate receptor, metabotropic 1                              |
| EDG5    | sphingosine-1-phosphate receptor 2                                                 | GRM3    | glutamate receptor, metabotropic 3                              |
| GPR37   | G protein-coupled receptor 37 (endothelin receptor type B-like)                    | GRM5    | glutamate receptor, metabotropic 5                              |
| GPR52   | G protein-coupled receptor 52                                                      | GRM6    | glutamate receptor, metabotropic 6                              |
| CCR5    | chemokine (C-C motif) receptor 5                                                   | GPR97   | G protein-coupled receptor 97                                   |
| GCNT2   | glucosaminyl (N-acetyl) transferase 2, I-branching enzyme (I blood group)          | GPRC5C  | G protein-coupled receptor, family C, group 5, member C         |
| GPR88   | G-protein coupled receptor 88                                                      | GPRC5D  | G protein-coupled receptor, family C, group 5, member D         |
| EDG2    | lysophosphatidic acid receptor 1                                                   | GPRC6A  | G protein-coupled receptor, family C, group 6, member A         |
| ADMR    | G protein-coupled receptor 182                                                     | GPR73L1 | prokineticin receptor 2                                         |
| GPR44   | G protein-coupled receptor 44                                                      | GPR74   | G protein-coupled receptor 74                                   |
| MRGPRF  | MAS-related GPR, member F                                                          | GPR78   | G protein-coupled receptor 78                                   |
| ADRA1D  | adrenergic, alpha-1D-, receptor                                                    | GPR84   | G protein-coupled receptor 78                                   |
| SMO     | smoothed homolog (Drosophila)                                                      | GPR27   | G protein-coupled receptor 27                                   |
| PTGIR   | prostaglandin I2 (prostacyclin) receptor (IP)                                      | GPR37L1 | G protein-coupled receptor 37 like 1                            |
| ELTD1   | EGF, latrophilin and seven transmembrane domain containing 1                       | GPR50   | G protein-coupled receptor 50                                   |
| HTR2B   | 5-hydroxytryptamine (serotonin) receptor 2B                                        | GPR73   | prokineticin receptor 1                                         |
| NMUR1   | neuromedin U receptor 1                                                            | GPR17   | G protein-coupled receptor 17                                   |
| NTSR1   | neurotensin receptor 1 (high affinity)                                             | GPR18   | G protein-coupled receptor 18                                   |
| C5R1    | complement component 5a receptor 1                                                 | GPR20   | G protein-coupled receptor 20                                   |
| P2RY12  | purinergic receptor P2Y, G-protein coupled, 12                                     | GPR26   | G protein-coupled receptor 26                                   |
| CCR10   | chemokine (C-C motif) receptor 10                                                  | GPR114  | G protein-coupled receptor 114                                  |
| TBP     | TATA binding protein                                                               | GPR123  | G protein-coupled receptor 123                                  |
| 18S     |                                                                                    | GPR128  | G protein-coupled receptor 128                                  |
| CHRM2   | cholinergic receptor, muscarinic 2                                                 | GPR145  | melanin-concentrating hormone receptor 2                        |
| FZD1    | frizzled homolog 1 (Drosophila)                                                    | GPBAR1  | G protein-coupled bile acid receptor 1                          |
| AVPR2   | arginine vasopressin receptor 2                                                    | GPR10   | prolactin releasing hormone receptor                            |
| VIPR2   | vasoactive intestinal peptide receptor 2                                           | GPR103  | G protein-coupled receptor 103                                  |
| GPR124  | G protein-coupled receptor 124                                                     | GPR112  | G protein-coupled receptor 112                                  |
| F2R     | coagulation factor II (thrombin) receptor                                          | GALR3   | galanin receptor 3                                              |
| SSTR1   | somatostatin receptor 1                                                            | GHRHR   | growth hormone releasing hormone receptor                       |
| B2M     | beta-2 microglobulin                                                               | GLP1R   | glucagon-like peptide 1 receptor                                |
| FPRL1   | formyl peptide receptor-like 1                                                     | GLP2R   | glucagon-like peptide 2 receptor                                |
| TACR3   | tachykinin receptor 3                                                              | EMR3    | egf-like module containing, mucin-like, hormone receptor-like 3 |
| TAS1R1  | taste receptor, type 1, member 1                                                   | F2RL3   | coagulation factor II (thrombin) receptor-like 3                |
| TRBV5-4 | T cell receptor beta variable 5-4                                                  | FSHR    | follicle stimulating hormone receptor                           |
| TRHR    | thyrotropin-releasing hormone receptor                                             | GALR1   | galanin receptor 1                                              |
| OPN1SW  | opsin 1 (cone pigments), short-wave-sensitive                                      | CASR    | calcium-sensing receptor                                        |
| OPN4    | opsin 4                                                                            | CCKAR   | cholecystokinin A receptor                                      |
| OPRD1   | opioid receptor, delta 1                                                           | CCKBR   | cholecystokinin B receptor                                      |
| OPRK1   | opioid receptor, kappa 1                                                           | CCR2    | chemokine (C-C motif) receptor 2                                |
| NMUR2   | neuromedin U receptor 2                                                            | AGTR1   | angiotensin II receptor, type 1                                 |
| NPY2R   | neuropeptide Y receptor Y2                                                         | AGTR2   | angiotensin II receptor, type 2                                 |
| NPY5R   | neuropeptide Y receptor Y5                                                         | BAI3    | brain-specific angiogenesis inhibitor 3                         |
| NTSR2   | neurotensin receptor 2                                                             | BRS3    | bombesin-like receptor 3                                        |

| Symbol  | Description                                                    | Symbol  | Description                                                                      |
|---------|----------------------------------------------------------------|---------|----------------------------------------------------------------------------------|
| TSHR    | thyroid stimulating hormone receptor                           | GPR115  | G protein-coupled receptor 115                                                   |
| UTS2R   | urotensin 2 receptor                                           | VIPR1   | vasoactive intestinal peptide receptor 1                                         |
| ADCYAP1 | adenylate cyclase activating polypeptide 1                     | GPR143  | G protein-coupled receptor 143                                                   |
| ADRA1A  | adrenergic, alpha-1A-, receptor                                | GPR92   | G protein-coupled receptor 92                                                    |
| ADRA2A  | adrenergic, alpha-2A-, receptor                                | LGR6    | leucine-rich repeat-containing G protein-coupled receptor 6                      |
| ADRB3   | adrenergic receptor, beta 3                                    | HRH1    | histamine receptor H1                                                            |
| CCR6    | chemokine (C-C motif) receptor 6                               | LANCL2  | LanC lantibiotic synthetase component C-like 2                                   |
| CCR7    | chemokine (C-C motif) receptor 7                               | PTAFR   | platelet-activating factor receptor                                              |
| CCR8    | chemokine (C-C motif) receptor 8                               | GPR56   | G protein-coupled receptor 56                                                    |
| CCR9    | chemokine (C-C motif) receptor 9                               | RPLP0   | acidic ribosomal protein P0                                                      |
| CNR1    | cannabinoid receptor 1                                         | GPR15   | G protein-coupled receptor 15                                                    |
| CNR2    | cannabinoid receptor 2                                         | GPR87   | G protein-coupled receptor 87                                                    |
| CRHR1   | corticotropin releasing hormone receptor 1                     | LTB4R   | leukotriene B4 receptor                                                          |
| CRHR2   | corticotropin releasing hormone receptor 2                     | CELSR1  | cadherin, EGF LAG seven-pass G-type receptor 1 (flamingo homolog, Drosophila)    |
| CX3CR1  | chemokine (C-X3-C motif) receptor 1                            | GPRC5A  | G protein-coupled receptor, family C, group 5, member A                          |
| CXCR3   | chemokine (C-X-C motif) receptor 3                             | FZD3    | frizzled homolog 3 (Drosophila)                                                  |
| CXCR4   | chemokine (C-X-C motif) receptor 4                             | P2RY2   | purinergic receptor P2Y, G-protein coupled, 2                                    |
| CXCR6   | chemokine (C-X-C motif) receptor 6                             | HDAC3   | Histone deacetylase 3                                                            |
| DRD2    | dopamine receptor D2                                           | GPR7    | G protein-coupled receptor 7                                                     |
| DRD3    | dopamine receptor D3                                           | GPR125  | G protein-coupled receptor 125                                                   |
| DRD4    | dopamine receptor D4                                           | GPR35   | G protein-coupled receptor 35                                                    |
| EDNRB   | endothelin receptor type B                                     | ADRB1   | adrenergic receptor, beta 1                                                      |
| SCTR    | secretin receptor                                              | GPR82   | G protein-coupled receptor 82                                                    |
| SSTR4   | somatostatin receptor 4                                        | PGK1    | phosphoglycerate kinase 1                                                        |
| SUCNR1  | succinate receptor 1                                           | HTR1D   | 5-hydroxytryptamine (serotonin) receptor 1D                                      |
| TACR1   | tachykinin receptor 1                                          | F2RL1   | coagulation factor II (thrombin) receptor-like 1                                 |
| PTPN22  | protein tyrosine phosphatase, non-receptor type 22 (lymphoid)  | P2RY11  | purinergic receptor P2Y, G-protein coupled, 11                                   |
| RGR     | retinal G protein coupled receptor                             | P2RY4   | pyrimidinergic receptor P2Y, G-protein coupled, 4                                |
| RHO     | rhomboid                                                       | SEN3    | SUMO1/sentrin/SMT3 specific peptidase 3                                          |
| RRH     | retinal pigment epithelium derived rhodopsin homolog           | LTB4R2  | leukotriene B4 receptor 2                                                        |
| OPRM1   | opioid receptor, mu 1                                          | CELSR3  | cadherin, EGF LAG seven-pass G-type receptor 3                                   |
| OR7E5P  | olfactory receptor, family 7, subfamily E, member 5 pseudogene | EDG4    | lysophosphatidic acid receptor 2                                                 |
| P2RY14  | purinergic receptor P2Y, G-protein coupled, 14                 | GPR22   | G protein-coupled receptor 22                                                    |
| P2RY6   | pyrimidinergic receptor P2Y, G-protein coupled, 6              | HPRT1   | hypoxanthine phosphoribosyltransferase 1                                         |
| PCDH15  | protocadherin-related 15                                       | MRGPRX2 | MAS-related GPR, member X2                                                       |
| PTGDR   | prostaglandin D2 receptor (DP)                                 | IPO8    | importin 8                                                                       |
| PTGER3  | prostaglandin E receptor 3 (subtype EP3)                       | ADRB2   | adrenergic, beta-2-, receptor, surface                                           |
| PTH2R   | parathyroid hormone 2 receptor                                 | HMBS    | hydroxymethylbilane synthase                                                     |
| F2RL2   | coagulation factor II (thrombin) receptor-like 2               | LGR4    | leucine-rich repeat-containing G protein-coupled receptor 4                      |
| CCRL1   | chemokine (C-C motif) receptor-like 1                          | FPR1    | formyl peptide receptor 1                                                        |
| P2RY1   | purinergic receptor P2Y, G-protein coupled, 1                  | GPR3    | G-protein coupled receptor 3                                                     |
| EDG3    | sphingosine-1-phosphate receptor 3                             | EMR2    | egf-like module containing, mucin-like, hormone receptor-like 2                  |
| EDG1    | sphingosine-1-phosphate receptor 1                             | CHRM4   | cholinergic receptor, muscarinic 4                                               |
| GPR61   | G protein-coupled receptor 61                                  | GPR75   | G protein-coupled receptor 75                                                    |
| GNRHR2  | gonadotropin-releasing hormone (type 2) receptor 2             | NPY6R   | neuropeptide Y receptor Y6                                                       |
| BDKRB1  | bradykinin receptor B1                                         | GUSB    | glucuronidase, beta                                                              |
| FZD4    | frizzled homolog 4 (Drosophila)                                | ADORA2A | adenosine A2a receptor                                                           |
| MRGPRE  | MAS-related GPR, member E                                      | TFRC    | transferrin receptor (p90, CD71)                                                 |
| AVPR1B  | arginine vasopressin receptor 1B                               | GPR17   | G protein-coupled receptor 17                                                    |
| PR153   | GPR153-Hs00664129_s1                                           | EDNRA   | endothelin receptor type A                                                       |
| GPR161  | G protein-coupled receptor 161                                 | GPR116  | G protein-coupled receptor 116                                                   |
| CCR1    | chemokine (C-C motif) receptor 1                               | GPR55   | G protein-coupled receptor 55                                                    |
| VN1R1   | vomeroneasal 1 receptor 1                                      | MC1R    | melanocortin 1 receptor                                                          |
| FZD7    | frizzled homolog 7 (Drosophila)                                | GPR160  | G protein-coupled receptor 160                                                   |
| FZD8    | frizzled homolog 8 (Drosophila)                                | EDG7    | endothelial differentiation, lysophosphatidic acid G-protein-coupled receptor, 7 |
| GPR19   | G protein-coupled receptor 19                                  | MASS1   | monogenic, audiogenic seizure susceptibility 1                                   |
| GPR110  | G protein-coupled receptor 110                                 | GPR64   | G protein-coupled receptor 64                                                    |
| GPR81   | G protein-coupled receptor 81                                  | MTNR1A  | melatonin receptor 1A                                                            |
| ADORA2B | adenosine A2b receptor                                         | AVPR1A  | arginine vasopressin receptor 1A                                                 |
| GPR43   | free fatty acid receptor 2                                     | TM7SF1  | G protein-coupled receptor 137B                                                  |
| GALR2   | galanin receptor 2                                             |         |                                                                                  |
| GPR39   | G protein-coupled receptor 39                                  |         |                                                                                  |
| PHGDH   | phosphoglycerate dehydrogenase                                 |         |                                                                                  |
| FZD5    | frizzled homolog 5 (Drosophila)                                |         |                                                                                  |
