# Supplementary material for: Multiple Analyses of G-Protein Coupled Receptor (GPCR) Expression in the Development of Gefitinib-Resistance in Transforming Non-Small-Cell Lung Cancer
Source: PubMed Central journal article supplement (PMC3483178; doi:10.1371/journal.pone.0044368), 2012-10-29
Supplement: pone.0044368.s002.pdf [file pone.0044368.s002.pdf]

**Figure S2 Effects of several GPCR agonists on the growth of H1975 cells**

| Ligand name (targeted receptor)                                                                                      | Dose       | Cell viability (% of control) |
|----------------------------------------------------------------------------------------------------------------------|------------|-------------------------------|
| CGS-21680<br>(Adenosine A2a receptor)                                                                                | 1 $\mu$ M  | 93.86 $\pm$ 1.40              |
|                                                                                                                      | 10 $\mu$ M | 102.8 $\pm$ 1.28              |
| Angiotensin II<br>(Angiotensin II receptor-like 1)                                                                   | 1 $\mu$ M  | 99.94 $\pm$ 2.16              |
|                                                                                                                      | 10 $\mu$ M | 99.12 $\pm$ 1.99              |
| 2-(Methylthio) adenosine 5'-triphosphate tetrasodium salt hydrate<br>(Purinergic receptor P2Y, G-protein coupled, 2) | 1 $\mu$ M  | 99.81 $\pm$ 2.36              |
|                                                                                                                      | 10 $\mu$ M | 102.3 $\pm$ 1.87              |
| Beraprost sodium<br>(Prostaglandin I <sub>2</sub> receptor (IP))                                                     | 1 $\mu$ M  | 101.3 $\pm$ 0.89              |
|                                                                                                                      | 10 $\mu$ M | 98.94 $\pm$ 2.27              |
| BW723C86<br>(5-hydroxytryptamine receptor 2B)                                                                        | 1 $\mu$ M  | 89.0 $\pm$ 1.38               |
|                                                                                                                      | 10 $\mu$ M | 93.85 $\pm$ 2.78              |
| [Arg <sup>8</sup> ]-vasopressin acetate salt<br>(Arginine vasopressin receptor 1A)                                   | 1 $\mu$ M  | 101.0 $\pm$ 1.14              |
|                                                                                                                      | 10 $\mu$ M | 98.22 $\pm$ 2.66              |
